# Supplementary material for: The Ufm1-activating enzyme Uba5 is indispensable for erythroid differentiation in mice
Source: PubMed Central journal article supplement — Nat Commun. 2011 Feb 8;2:181–. doi: 10.1038/ncomms1182 (PMC3105337; doi:10.1038/ncomms1182), 2011-02-08
Supplement: ncomms1182-s1.pdf [file ncomms1182-s1.pdf]

## Supplementary information

### **The Ufm1-activating enzyme Uba5 is indispensable for erythroid differentiation in mice**

Kanako Tatsumi<sup>1,2</sup>, Harumi Yamamoto-Mukai<sup>2</sup>, Ritsuko Shimizu<sup>3</sup>, Satoshi Waguri<sup>4</sup>, Yu-Shin Sou<sup>1</sup>, Ayako Sakamoto<sup>1</sup>, Choji Taya<sup>5</sup>, Hiroshi Shitara<sup>5</sup>, Takahiko Hara<sup>6</sup>, Chin Ha Chung<sup>7</sup>, Keiji Tanaka<sup>1</sup>, Masayuki Yamamoto<sup>2</sup> and Masaaki Komatsu<sup>1,8</sup>

<sup>1</sup>Protein Metabolism Project, <sup>5</sup>Laboratory of Mouse Models for Human Heritable Diseases, <sup>6</sup>Stem Cell Project, Tokyo Metropolitan Institute of Medical Science, Setagaya-ku, Tokyo 156-8506, Japan

<sup>2</sup>Department of Medical Biochemistry, <sup>3</sup>Department of Molecular Hematology, Tohoku University Graduate School of Medicine, Aoba-ku, Sendai 980-8575, Japan

<sup>4</sup>Department of Anatomy and Histology, Fukushima Medical University School of Medicine, 1 Hikarigaoka, Fukushima 960-1295, Japan

<sup>7</sup>School of Biological Science, Seoul National University, Seoul 151-742, Korea

<sup>8</sup>PRESTO, Japan Science and Technology Corporation, Kawaguchi 332-0012, Japan

## Supplementary figures

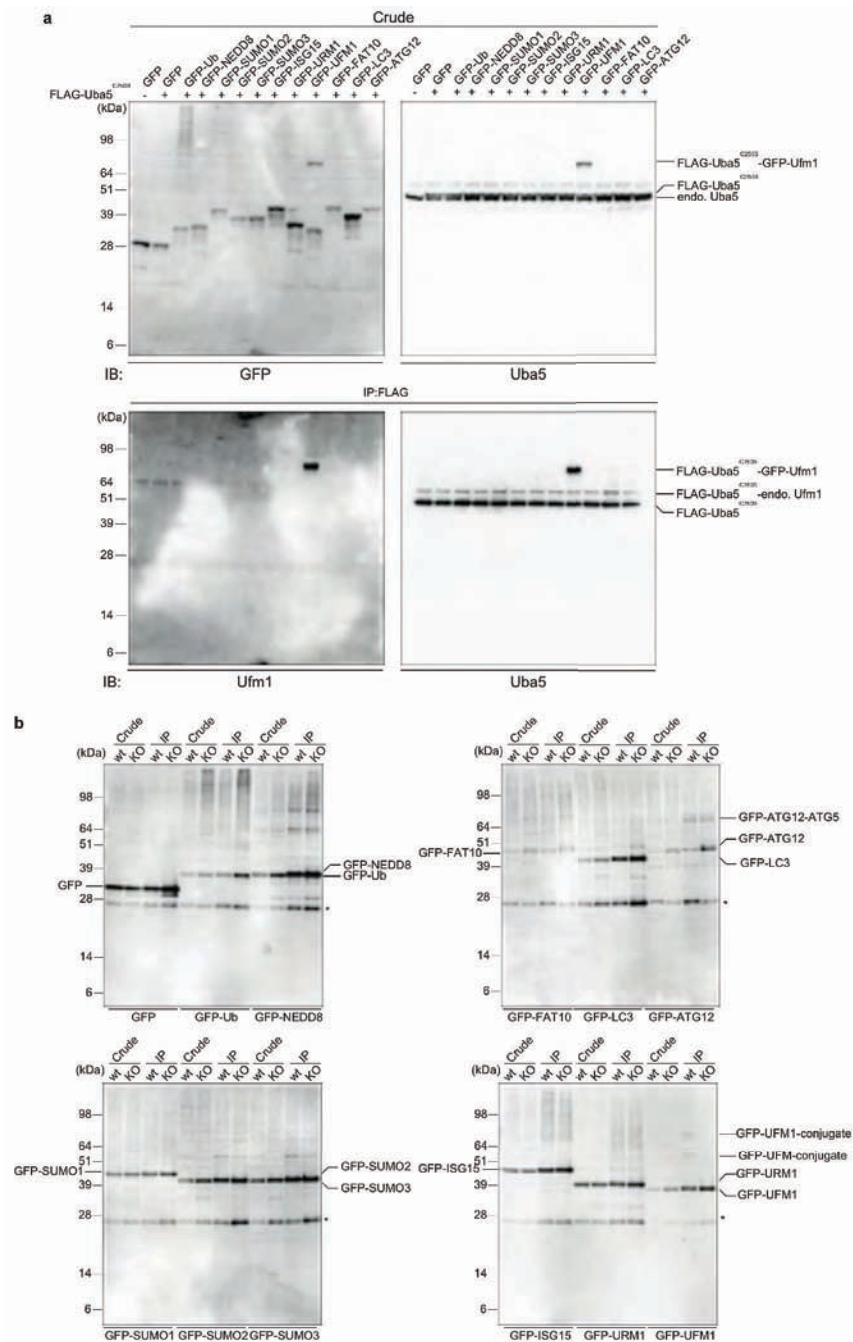

**Supplementary Figure S1. Uba5 activates Ufm1 but not other ubiquitin-like proteins (UBLs).** (a) Immunoblot analysis. FLAG-Uba5<sup>C250S</sup> together with each GFP-UBL were expressed in HEK293T cells. The cell lysates (top panels) and immunoprecipitants by anti-FLAG antibody (bottom panels) were subjected to SDS-PAGE, followed by immunoblot analysis with the indicated antibodies. (b) Immunoblot analysis of UBL-conjugations in *Uba5*-knockout mouse embryonic fibroblasts (MEFs). GFP-tagged UBLs were expressed in wild-type or *Uba5*-deficient MEFs. The cell lysates and immunoprecipitants by anti-GFP antibody were subjected to SDS-PAGE followed by immunoblot analysis with anti-GFP antibody. Asterisks: irrelevant bands.

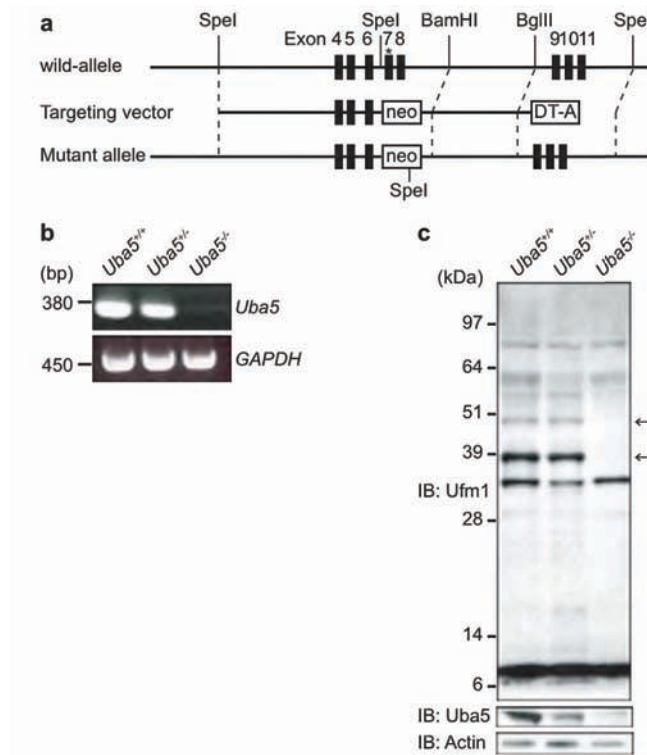

**Supplementary Figure S2. Generation of *Uba5* knockout mice.** (a) Schematic representation of the targeting vector and the targeted allele of the *Uba5* gene. The coding exons numbered in accordance with the initiation site as exon 1 are depicted by black boxes. Asterisk: the essential cysteine residue on exon 7. SpeI, SpeI sites; BamHI, BamHI site; BglII, BglII site; neo, neomycin resistance gene cassette; DT-A, diphtheria toxin gene. (b) Expression of *Uba5* transcript. Total RNA was extracted from each genotyped MEF. The *Uba5* transcript level was detected by RT-PCR. (c) Immunoblot analysis of *Uba5* in MEFs. The lysates were immunoblotted with anti-Ufm1, anti-*Uba5* and anti-actin antibodies. Arrows: presumptive target proteins for ufmylation (e.g. 39- and 51-kDa bands).

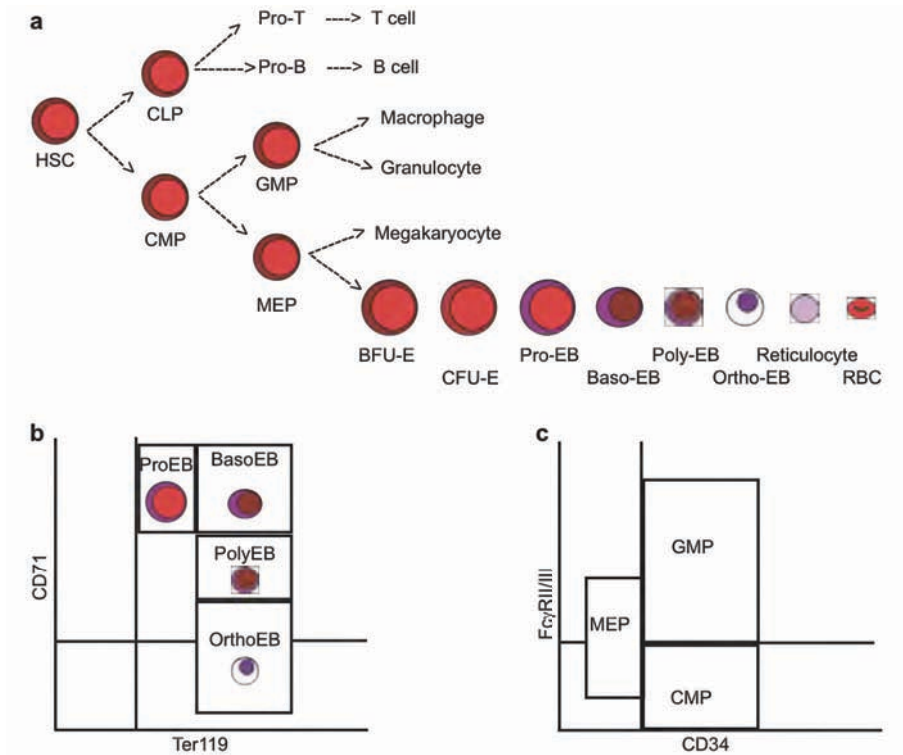

**Supplementary Figure S3. Schemas for erythropoiesis and FACS analyses.** (a) Schematic diagram of erythropoiesis from haematopoietic stem cells (HSCs). CMP, common myeloid progenitor; MEP, megakaryocyte/erythroid progenitor; BFU-E, erythroid burst-forming unit; CFU-E, erythroid colony-forming unit; Pro-EB, proerythroblast; Baso-EB, basophilic erythroblast; Poly-EB: polychromatic erythroblast; Ortho-EB, orthochromatic erythroblast; RBC, red blood cell; CLP, common lymphoid progenitor; GMP, granulocyte macrophage progenitor. (b) Schematic diagram of Pro-EB ( $\text{Ter119}^{\text{med}}\text{CD71}^{\text{high}}$ ), Baso-EB ( $\text{Ter119}^{\text{high}}\text{CD71}^{\text{high}}$ ), Poly-EB ( $\text{Ter119}^{\text{high}}\text{CD71}^{\text{med}}$ ) and Ortho-EB ( $\text{Ter119}^{\text{high}}\text{CD71}^{\text{low}}$ ) populations by FACS analysis. (c) Schematic diagram of CMP ( $\text{CD34}^{\text{high}}\text{Fc}\gamma\text{RII/III}^{\text{low}}$ ), MEP ( $\text{CD34}^{\text{low}}\text{Fc}\gamma\text{RII/III}^{\text{low}}$ ) and GMP ( $\text{CD34}^{\text{high}}\text{Fc}\gamma\text{RII/III}^{\text{high}}$ ) populations by FACS analysis.

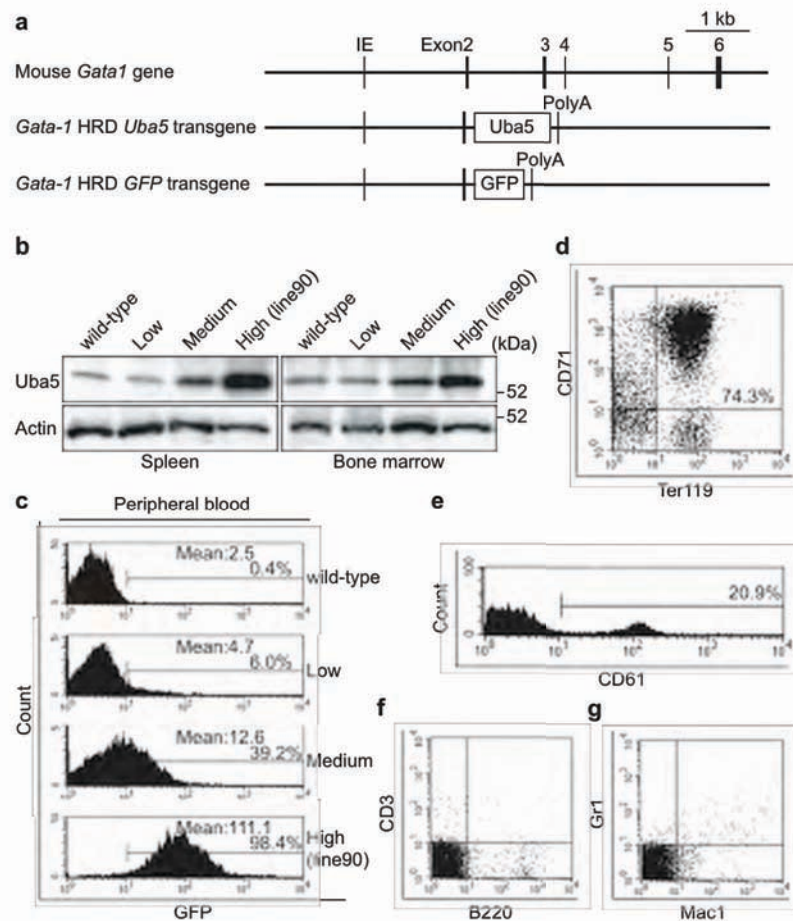

**Supplementary Figure S4. Generation of mouse lines expressing *Uba5* in erythroid lineage.** (a) Genomic structure of the mouse *Gata-1* gene and construction of the *Gata-1*-HRD-*Uba5* and *Gata-1*-HRD-*GFP* transgenes. The coding exons numbered in accordance with the initiation site (IE) as exon 1 are depicted by black boxes. (b) Expression of *Uba5* in the transgenic lines. Whole cell lysates were prepared from the spleen and bone marrow of 4-week-old transgenic mice and subsequently subjected to immunoblot analysis with an anti-*Uba5* antibody. An anti-actin antibody was used as an internal control. (c) Expression of *GFP* in the transgenic lines. *GFP*-positive peripheral blood samples were analysed by FACS. Percent values denote the proportion of *GFP*-positive cells in peripheral blood of 4-week-old transgenic mice. (d, e, f and g) *GFP*-positive peripheral blood cells were sub-fractionated into erythroid cells (d), CD61-expressing cells representing megakaryocytes (e), CD3- and B220-expressing cells representing lymphoid cells (f), and Gr1- and Mac1-expressing cells representing myeloid cells (g).

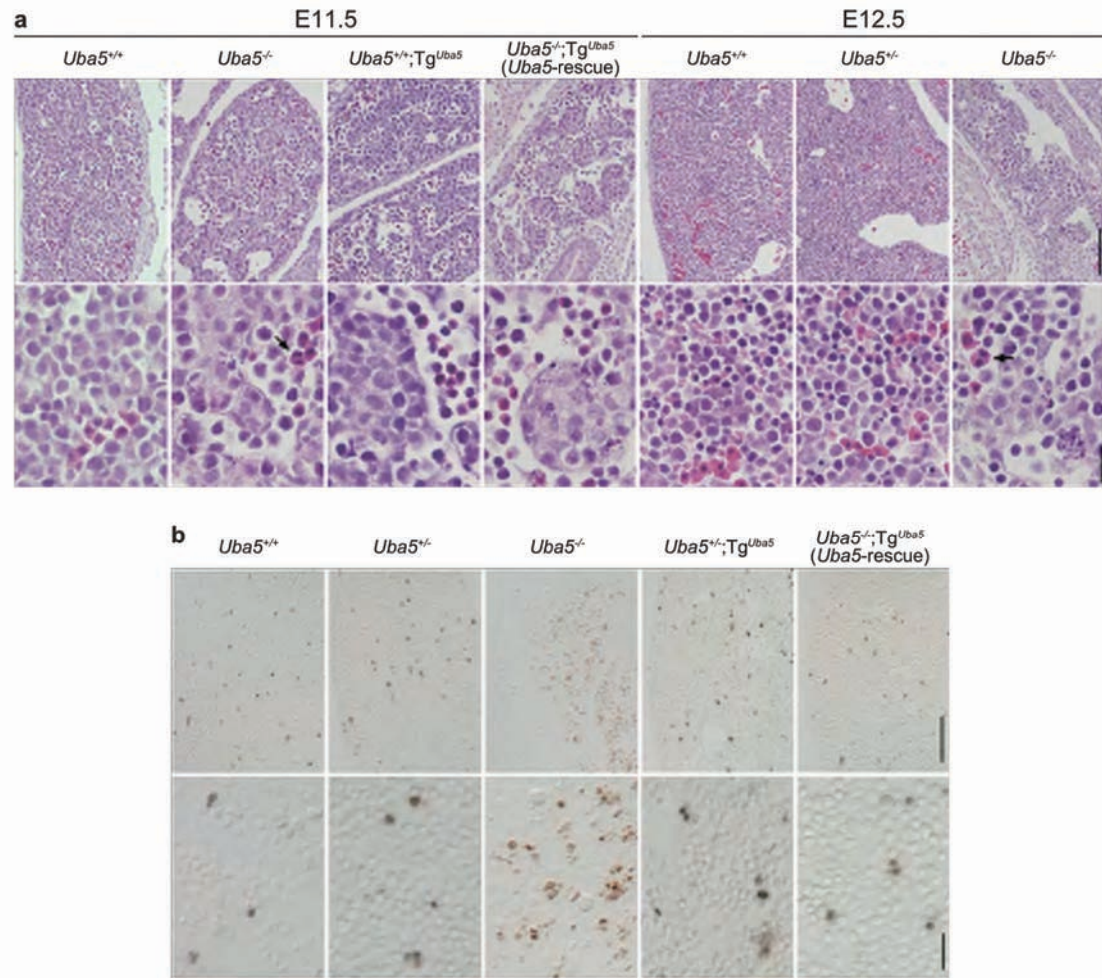

**Supplementary Figure S5. Morphological comparison of the different mouse genotypes.** (a) Haematoxylin & eosin-stained sections of livers from mice with the indicated genotype at E11.5 and E12.5. Arrows: abnormal multinucleated erythrocytes. Bars: top panel, 100  $\mu$ m; bottom panel, 20  $\mu$ m. (b) TUNEL staining of livers from mice with the indicated genotype at E12.5. Bars: top panel, 100  $\mu$ m; bottom panel, 20  $\mu$ m.

## Supplementary table

**Supplementary Table S1.** List of E1s and their corresponding UBLs and E2s in humans.

| <b>E1 enzyme</b> | <b>UBL</b>       | <b>E2 enzyme</b> |
|------------------|------------------|------------------|
| UBA1             | UBIQUITIN        | Many             |
| UBA2-AOS1        | SUMO1, 2, 3      | UBC9             |
| UBA3-ULA1        | NEDD8            | UBC12            |
| UBA4             | URM1             | Unknown          |
| UBA5             | UFM1             | UFC1             |
| UBA6             | UBIQUITIN, FAT10 | USE1             |
| UBE1L            | ISG15            | UBCH8            |
| ATG7             | ATG12, LC3       | ATG10, ATG3      |
